# Supplementary material for: Exploring Professional Practice Environments and Organisational Context Factors Affecting Nurses’ Adoption of Evidence-Based Practice: A Scoping Review
Source: MDPI journal article supplement (doi:10.3390/healthcare12020245), 2024-01-18
Supplement: s1 [file s1]

**Table S3.** Search strategy conducted in the PubMed, Web of Science, CINAHL (via EBSCO) and MEDLINE (via EBSCO) databases, on 1 March 2023.

| SEARCH NO.            | SEARCH TERMS AND EXPRESSIONS                                                                                                                                                                                   | RESULTS   |
|-----------------------|----------------------------------------------------------------------------------------------------------------------------------------------------------------------------------------------------------------|-----------|
| <b>PubMed</b>         |                                                                                                                                                                                                                |           |
| #1                    | "Nursing"[Mesh] OR "Nurses"[Mesh] OR "nurs*"[tiab]                                                                                                                                                             | 674.115   |
| #2                    | "Students"[Mesh] OR "nursing student*"[tiab] OR "student*"[tiab]                                                                                                                                               | 388.165   |
| #3                    | #1 NOT #2                                                                                                                                                                                                      | 623.613   |
| #4                    | "facilitator"[tiab] OR "enabler"[tiab] OR "enhancer"[tiab] OR "implement*"[tiab] OR "helper"[tiab]                                                                                                             | 785.792   |
| #5                    | "hindering"[tiab] OR "obstacle"[tiab] OR "barrier"[tiab] OR "difficult*"[tiab] OR "impediment*"[tiab]                                                                                                          | 1.021.015 |
| #6                    | #4 OR #5                                                                                                                                                                                                       | 1.756.602 |
| #7                    | "Evidence-Based Practice"[Mesh] OR "evidence-based practice"[tiab] OR "EBP"[tiab]                                                                                                                              | 107.748   |
| #8                    | #6 AND #7                                                                                                                                                                                                      | 20.032    |
| #9                    | "health organization*"[tiab] OR "healthcare organization*"[tiab] OR "healthcare organization*"[tiab] "hospital*"[tiab] OR "organization*"[tiab] OR "organization*"[tiab]                                       | 460.317   |
| #10                   | #3 AND #8 AND #9                                                                                                                                                                                               | 358       |
| <b>Web of Science</b> |                                                                                                                                                                                                                |           |
| #1                    | ((TS=(Nursing)) OR TS=(Nurses)) OR TS=(nurs*)                                                                                                                                                                  | 410.048   |
| #2                    | ((TS=(Students)) OR TS=(nursing student*)) OR TS=(student*)                                                                                                                                                    | 1.102.549 |
| #3                    | #1 NOT #2                                                                                                                                                                                                      | 370.057   |
| #4                    | ((((TS=(facilitator)) OR TS=(enabler)) OR TS=(enhancer)) OR TS=(implement*)) OR TS=(helper)                                                                                                                    | 2.519.232 |
| #5                    | ((((TS=(hindering)) OR TS=(obstacle)) OR TS=(barrier)) OR TS=(difficult*)) OR TS=(impediment)                                                                                                                  | 2.508.367 |
| #6                    | #4 OR #5                                                                                                                                                                                                       | 4.792.566 |
| #7                    | (TS=(Evidence-Based Practice)) OR TS=(EBP)                                                                                                                                                                     | 83.096    |
| #8                    | #6 AND #7                                                                                                                                                                                                      | 31.434    |
| #9                    | (((((TS=(health organization)) OR TS=(healthcare organization*)) OR TS=(healthcare organization*)) OR TS=(hospital*)) OR TS=(organization*)) OR TS=(organization*)                                             | 2.484.535 |
| #10                   | #3 AND #8 AND #9                                                                                                                                                                                               | 1.455     |
| <b>CINAHL</b>         |                                                                                                                                                                                                                |           |
| S1                    | MH "Nurses" OR TI "Nurs*" OR AB "Nurs*"                                                                                                                                                                        | 652.048   |
| S2                    | MH "Students, College" OR MH "Students, Nursing" OR MH "Students, Pre-Nursing" OR TI "Undergraduat*" OR AB "Undergraduat*" OR TI "Student*" OR AB "Student*" OR TI "nursing student*" OR AB "nursing student*" | 237.966   |
| S3                    | S1 NOT S2                                                                                                                                                                                                      | 591.037   |
| S4                    | AB "facilitator" OR AB "enabler" OR AB "enhancer" OR AB "implement*" OR AB "helper"                                                                                                                            | 234.919   |
| S5                    | AB "hindering" OR AB "obstacle" OR AB "barrier" OR AB "difficult*" OR AB "impediment*"                                                                                                                         | 208.384   |
| S6                    | S4 OR S5                                                                                                                                                                                                       | 426.094   |
| S7                    | MH "Professional Practice, Evidence-Based" OR TI "evidence-based practice" OR AB "evidence-based practice" OR TI "EBP" OR AB "EBP"                                                                             | 39.241    |
| S8                    | S6 AND S7                                                                                                                                                                                                      | 7.442     |

|                |                                                                                                                                                                                                                |           |
|----------------|----------------------------------------------------------------------------------------------------------------------------------------------------------------------------------------------------------------|-----------|
| S9             | AB "health organization*" OR AB "healthcare organization*" OR AB "healthcare organization*" OR AB "hospital*" OR AB "organization*" OR AB "organization*"                                                      | 590.43    |
| S10            | S3 AND S8 AND S9                                                                                                                                                                                               | 623       |
| <b>MEDLINE</b> |                                                                                                                                                                                                                |           |
| S1             | MH "Nurses" OR TI "Nurs*" OR AB "Nurs*"                                                                                                                                                                        | 526.266   |
| S2             | MH "Students, College" OR MH "Students, Nursing" OR MH "Students, Pre-Nursing" OR TI "Undergraduat*" OR AB "Undergraduat*" OR TI "Student*" OR AB "Student*" OR TI "nursing student*" OR AB "nursing student*" | 377.263   |
| S3             | S1 NOT S2                                                                                                                                                                                                      | 479.521   |
| S4             | AB "facilitator" OR AB "enabler" OR AB "enhancer" OR AB "implement*" OR AB "helper"                                                                                                                            | 744.469   |
| S5             | AB "hindering" OR AB "obstacle" OR AB "barrier" OR AB "difficult*" OR AB "impediment*"                                                                                                                         | 981.126   |
| S6             | S4 OR S5                                                                                                                                                                                                       | 1.677.935 |
| S7             | MH "Professional Practice, Evidence-Based" OR TI "evidence-based practice" OR AB "evidence-based practice" OR TI "EBP" OR AB "EBP"                                                                             | 19.246    |
| S8             | S6 AND S7                                                                                                                                                                                                      | 6.718     |
| S9             | AB "health organization*" OR AB "healthcare organization*" OR AB "healthcare organization*" OR AB "hospital*" OR AB "organization*" OR AB "organization*"                                                      | 1.771.592 |
| S10            | S3 AND S8 AND S9                                                                                                                                                                                               | 453       |
| <b>TOTAL</b>   |                                                                                                                                                                                                                |           |
