# Supplementary material for: Exploring Professional Practice Environments and Organisational Context Factors Affecting Nurses’ Adoption of Evidence-Based Practice: A Scoping Review
Source: MDPI journal article supplement (doi:10.3390/healthcare12020245), 2024-01-18
Supplement: s1 [file s1]

**Table S2.** Abstract reporting checklist required from the Preferred Reporting Items for Systematic Reviews and Meta-Analyses for Scoping Reviews (PRISMA-ScR) Checklist [22,23]

| SECTION AND TOPIC       | ITEM # | PRISMA-SCR CHECKLIST ITEM                                                                                                                                                                                                                                                                            | Location where item is reported |
|-------------------------|--------|------------------------------------------------------------------------------------------------------------------------------------------------------------------------------------------------------------------------------------------------------------------------------------------------------|---------------------------------|
| <b>Title</b>            |        |                                                                                                                                                                                                                                                                                                      |                                 |
| Title                   | 1      | Identify the report as a scoping review.                                                                                                                                                                                                                                                             | Text on abstract                |
| <b>Background</b>       |        |                                                                                                                                                                                                                                                                                                      |                                 |
| Objectives              | 0      | Provide an explicit statement of the main objective(s) or question(s) the review addresses.                                                                                                                                                                                                          | Text on abstract                |
| <b>Methods</b>          |        |                                                                                                                                                                                                                                                                                                      |                                 |
| Eligibility criteria    | 3      | Specify the inclusion and exclusion criteria for the review.                                                                                                                                                                                                                                         | Text on abstract                |
| Information sources     | 4      | Specify the information sources (e.g. databases, registers) used to identify studies and the date when each was last searched.                                                                                                                                                                       | Text on abstract                |
| Risk of bias            | 5      | Specify the methods used to assess risk of bias in the included studies.                                                                                                                                                                                                                             | NA                              |
| Synthesis of results    | 6      | Specify the methods used to present and synthesize results.                                                                                                                                                                                                                                          | Text on abstract                |
| <b>Results</b>          |        |                                                                                                                                                                                                                                                                                                      |                                 |
| Included studies        | 7      | Give the total number of included studies and participants and summarize relevant characteristics of studies.                                                                                                                                                                                        | Text on abstract                |
| Synthesis of results    | 8      | Present results for main outcomes, preferably indicating the number of included studies and participants for each. If meta-analysis was done, report the summary estimate and confidence/credible interval. If comparing groups, indicate the direction of the effect (i.e. which group is favored). | Text on abstract                |
| <b>Discussion</b>       |        |                                                                                                                                                                                                                                                                                                      |                                 |
| Limitations of evidence | 9      | Provide a brief summary of the limitations of the evidence included in the review (e.g. study risk of bias, inconsistency and imprecision).                                                                                                                                                          | Text on abstract                |
| Interpretation          | 10     | Provide a general interpretation of the results and important implications.                                                                                                                                                                                                                          | Text on abstract                |
| <b>Other</b>            |        |                                                                                                                                                                                                                                                                                                      |                                 |
| Funding                 | 11     | Specify the primary source of funding for the review.                                                                                                                                                                                                                                                | NA                              |
| Registration            | 12     | Provide the register name and registration number.                                                                                                                                                                                                                                                   | Text on abstract                |

NA: not applicable.
