# Supplementary material for: Exploring Professional Practice Environments and Organisational Context Factors Affecting Nurses’ Adoption of Evidence-Based Practice: A Scoping Review
Source: MDPI journal article supplement (doi:10.3390/healthcare12020245), 2024-01-18
Supplement: s1 [file s1]

**Table S5.** Overview of the characteristics of the secondary studies included in the scoping review.

| Author(s)                                   | Source                                       | Title                                                                                                                                                                | Study type                                                                          | Included documents | Aim(s)                                                                                                                                                                                                                                                                             |
|---------------------------------------------|----------------------------------------------|----------------------------------------------------------------------------------------------------------------------------------------------------------------------|-------------------------------------------------------------------------------------|--------------------|------------------------------------------------------------------------------------------------------------------------------------------------------------------------------------------------------------------------------------------------------------------------------------|
| Mathieson et al (2018) [35], United Kingdom | Primary Health Care Research and Development | Strategies, facilitators and barriers to implementation of evidence-based practice in community nursing: a systematic mixed-studies review and qualitative synthesis | Mixed methods systematic review of the literature review with qualitative synthesis | 22 documents       | To evaluate and synthesise empirical literature on the implementation of evidence within community nursing, and to explore the use of implementation theory and identify the strategies needed and the barriers and facilitators to successful implementation within this context. |
| Bianchi et al. (2018) [62], Ireland         | Journal of Nursing Management                | A review of the role of nurse leadership in promoting and sustaining evidence-based practice                                                                         | Integrative review of the literature                                                | 28 documents       | To explore how nursing leadership influences evidence-based practice in healthcare practice settings.                                                                                                                                                                              |
| Shayan et al. (2019) [40], Uganda           | Worldviews on Evidence-Based Nursing         | Barriers associated with Evidence-Based Practice among nurses in low- and middle-income countries: A systematic review                                               | Systematic review of the literature                                                 | 16 documents       | To study the barriers to the implementation of EBP among nurses working in low- and middle-income countries.                                                                                                                                                                       |
| Shifaza et al. (2019) [53], Iran            | Journal of Evidence-Based Care               | System factors influencing the Australian nurses' evidence-based clinical decision making: A systematic review of recent studies                                     | Systematic review of the literature                                                 | 18 documents       | To systematically review the literature on factors associated with health systems and their possible impact on the process of implementing evidence-based practice.                                                                                                                |
| Lizarondo et al. (2019) [56], Australia     | Worldviews on Evidence-Based Nursing         | Barriers and facilitators to implementing evidence in African health care: A content analysis with implications for action                                           | Review of the literature (documental analysis)                                      | 20 documents       | To determine barriers and facilitators to the implementation of evidence in health contexts located in Africa, based on implementation projects carried out as part of the Joanna Briggs Institute (JBI) clinical fellowship programme.                                            |
| Ayoubian et al. (2020) [39], Iran           | Galen Medical Journal                        | Evaluation of facilitators and barriers to implementing Evidence-Based Practice in the health services: A systematic review                                          | Systematic review of the literature                                                 | 12 documents       | Systematically review the main relevant articles on barriers and facilitators to the implementation of evidence-based practice in health services.                                                                                                                                 |
| Clavijo-Chamorro et al. (2020) [51], Spain  | Western Journal of Nursing Research          | Context as a facilitator of the implementation of Evidence-based Nursing: A meta-synthesis                                                                           | Qualitative systematic review of the literature with meta-synthesis                 | 57 documents       | To explore the factors that facilitate the implementation of scientific evidence in clinical nursing practice, related to the work context.                                                                                                                                        |

|                                            |                                                                      |                                                                                                                                               |                                                                     |               |                                                                                                                                                                                                                             |
|--------------------------------------------|----------------------------------------------------------------------|-----------------------------------------------------------------------------------------------------------------------------------------------|---------------------------------------------------------------------|---------------|-----------------------------------------------------------------------------------------------------------------------------------------------------------------------------------------------------------------------------|
| Nelson-Brantley et al. (2020) [37], USA    | Journal of Nursing Administration                                    | Magnet(R) and Pathway to Excellence(R) focusing on research and Evidence-Based Practice                                                       | Review of the literature                                            | 5 documents   | Describe common barriers and effective strategies for developing a culture of research and evidence-based practice, with recommendations for accredited and non-accredited organisations.                                   |
| Pitsillidou et al. (2020) [69], Cyprus     | Journal of Nursing and Social Sciences Related to Health and Illness | Barriers to the adoption of evidence-based practice among nurses                                                                              | Systematic review of the literature                                 | 14 documents  | To study the barriers that prevent nurses from evaluating and applying evidence from research results in their nursing practice.                                                                                            |
| Younas (2020) [43], Canada                 | Nursing                                                              | Identifying international barriers and facilitators to research utilization                                                                   | Integrative review of the literature                                | 42 documents  | Define the concept of research utilisation and identify barriers and facilitators to the use of research in clinical nursing practice.                                                                                      |
| Berthelsen et al. (2021) [50], Denmark     | Worldviews on Evidence-Based Nursing                                 | The importance of context and organization culture in the understanding of nurses' barriers against Research Utilization: A systematic review | Systematic review of the literature                                 | 27 documents  | To identify nurses' perceptions of the barriers to the use of research in clinical practice between 2000 and 2018, on all continents, by reviewing studies that used the Barriers to Research Utilisation scale (BARRIERS). |
| McArthur, et al. (2021) [61], Canada       | Implementation Science                                               | Barriers and facilitators to implementing evidence-based guidelines in long-term care: a qualitative evidence synthesis                       | Qualitative systematic review of the literature                     | 33 documents  | Systematise the barriers and facilitators associated with implementing EBP in the context of long-term care.                                                                                                                |
| Clavijo-Chamorro et al. (2022) [41], Spain | Western Journal of Nursing Research                                  | Leadership as a facilitator of Evidence Implementation by nurse managers: A metasynthesis                                                     | Qualitative systematic review of the literature with meta-synthesis | 11 documents  | To clarify the factors that facilitate the implementation of scientific evidence by nurses, in the way it is perceived by nurse managers, considering their experience in terms of implementing research results.           |
| Dakka (2022) [48], Israel                  | SAGE Open Nursing                                                    | Nurses barriers to Evidence-Based Practice in palliative care: A systematic review                                                            | Systematic review of the literature with meta-analysis              | 7 documents   | To investigate nurses' barriers to implementing EBP in palliative care.                                                                                                                                                     |
| Teixeira et al. (2022) [36], Portugal      | Journal of Clinical Nursing                                          | Professional empowerment and evidence-based nursing: A mixed-method systematic review                                                         | Mixed methods systematic review of the literature                   | 9 documents   | To review, synthesise and integrate the results of primary studies on the relationship between professional empowerment and evidence-based practice in nurses.                                                              |
| Zhao et al. (2022) [59], China             | The Lancet Regional Health Western Pacific                           | Evidence-based practice implementation in healthcare in China: a living scoping review                                                        | Scoping review                                                      | 309 documents | To provide an overview of the progress of research into the implementation of EBP in China and to identify gaps for future studies.                                                                                         |
