# Supplementary material for: Exploring Professional Practice Environments and Organisational Context Factors Affecting Nurses’ Adoption of Evidence-Based Practice: A Scoping Review
Source: MDPI journal article supplement (doi:10.3390/healthcare12020245), 2024-01-18
Supplement: s1 [file s1]

**Table S4.** Overview of the characteristics of the primary studies included in the scoping review.

| Author(s)                                    | Source                                             | Title                                                                                                                                             | Study type                    | Participants                                           | Aim(s)                                                                                                                                                                                                                                                                                                                                                      |
|----------------------------------------------|----------------------------------------------------|---------------------------------------------------------------------------------------------------------------------------------------------------|-------------------------------|--------------------------------------------------------|-------------------------------------------------------------------------------------------------------------------------------------------------------------------------------------------------------------------------------------------------------------------------------------------------------------------------------------------------------------|
| Al-Maskari et al. (2018) [60], Oman          | Sultan Qaboos University Medical Journal           | Attitudes towards and perceptions regarding the implementation of Evidence-Based Practice among Omani nurses                                      | Cross-sectional study         | 98 nurse managers<br>162 staff nurses                  | To explore Omani nurses' attitudes towards EBP implementation and their perceptions of barriers and facilitators to EBP implementation.<br>To compare differences in the attitudes and perceptions of Omani nurse managers and clinical staff nurses, considering that these two professional groups play key roles in providing high-quality nursing care. |
| Fry et al. (2018) [57], Australia            | International Journal of Evidence-Based Healthcare | Nursing and midwifery use, perceptions and barriers to evidence-based practice: a cross-sectional survey                                          | Cross-sectional study         | 204 staff nurses                                       | Explore how evidence-based knowledge and evidence-based practice are obtained, utilised and practised in a clinical context.                                                                                                                                                                                                                                |
| Gifford et al. (2018) [55], China            | BMC Nursing                                        | When east meets west: a qualitative study of barriers and facilitators to evidence-based practice in Hunan China                                  | Qualitative descriptive study | 2 nurse managers<br>6 nurse managers<br>5 staff nurses | To explore barriers and facilitators to evidence-based practice in Hunan province, a less developed region in China.                                                                                                                                                                                                                                        |
| van der Goot et al. (2018) [46], Netherlands | Nurse Education Today                              | The effect of a multifaceted evidence-based practice programme for nurses on knowledge, skills, attitudes, and perceived barriers: A cohort study | Cross-sectional study         | 58 staff nurses                                        | To measure the results of a six-month EBP programme on nurses' knowledge, skills, attitudes and perception of barriers in a context of implementing EBP.                                                                                                                                                                                                    |
| Azmoude et al. (2018) [42], Iran             | Malaysian Journal of Medical Sciences              | Midwives' attitude and barriers of Evidence Based Practice in maternity care                                                                      | Cross-sectional study         | 76 midwife nurses                                      | To describe the attitude of Iranian obstetric nurses and their perception of the barriers to evidence-based practice in the context of maternal and obstetric health nursing care.                                                                                                                                                                          |
| Nkrumah et al. (2018) [47], Ghana            | Pan African Medical Journal                        | Barriers for nurses' participation in and utilisation of clinical research in three hospitals within the Kumasi Metropolis, Ghana                 | Cross-sectional study         | 158 staff nurses                                       | To study the proportion of nurses involved in clinical research activities, as well as the barriers to the implementation of EBP by nurses practising in health institutions in the Kumasi metropolitan area in Ghana.                                                                                                                                      |
| Shuman et al. (2018) [63], USA               | Implementation Science                             | Associations among unit leadership and unit climates for implementation in acute care: a cross-sectional study                                    | Cross-sectional study         | 22 nurse managers<br>287 staff nurses                  | To analyse the contribution of nurse managers in terms of leadership and competence in EBP in what shapes the organisational climate of medical-surgical services in the implementation of EBP.                                                                                                                                                             |

|                                              |                                       |                                                                                                                                          |                                          |                                       |                                                                                                                                                                                                                                                         |
|----------------------------------------------|---------------------------------------|------------------------------------------------------------------------------------------------------------------------------------------|------------------------------------------|---------------------------------------|---------------------------------------------------------------------------------------------------------------------------------------------------------------------------------------------------------------------------------------------------------|
| Lafuente-Lafuente et al. (2019) [68], France | BMJ Open                              | Knowledge and use of evidence-based medicine in daily practice by health professionals: a cross-sectional survey                         | Cross-sectional study                    | 54 staff nurses                       | To understand the regularity with which health professionals have actually used EBP in their daily clinical practice.                                                                                                                                   |
| Pittman et al. (2019) [64], USA              | Worldviews on Evidence-Based Nursing  | A multisite health system survey to assess organizational context to support Evidence-Based Practice                                     | Cross-sectional study                    | 94 nurse managers<br>701 staff nurses | To study the organisational hospital context and the level of preparation for implementing EBP, and to describe EBP implementing in a hospital context.                                                                                                 |
| Alqahtani et al. (2020) [9], Saudi Arabia    | Journal of Clinical Nursing           | Nurses' evidence-based practice knowledge, attitudes and implementation: A cross-sectional study                                         | Cross-sectional study                    | 227 staff nurses                      | To study the influence of nurses' individual factors in terms of knowledge, attitudes and implementation of EBP in Saudi Arabia and to identify facilitators and barriers to the implementation of EBP from the perspective of this professional group. |
| Chen et al. (2020) [38], China               | Journal of Nursing Management         | Value, knowledge and implementation on evidence-based practice among nurse managers in china: A regional cross-sectional survey          | Cross-sectional study                    | 1166 nurse managers                   | To describe the value, knowledge and implementation of evidence-based practice (EBP) among Chinese nurse managers, as well as the factors associated with their implementation of EBP.                                                                  |
| Fu et al. (2020) [54], China                 | Nursing & Health Sciences             | The barriers to evidence-based nursing implementation in mainland China: A qualitative content analysis                                  | Qualitative descriptive study            | 45 staff nurses                       | To describe the participants' experiences and opinions on the barriers to the implementation of evidence-based nursing in mainland China.                                                                                                               |
| Dessie et al. (2020) [52], Ethiopia          | Current Therapeutic Research          | Evidence-Based Practice and associated factors among health care providers working in public hospitals in Northwest Ethiopia during 2017 | Cross-sectional study                    | 342 staff nurses                      | To assess the reported level of EBP utilisation and the factors associated with its implementation among healthcare professionals working in public hospitals in north-west Ethiopia.                                                                   |
| Ost et al. (2020) [28], USA                  | Critical Care Nurse                   | Aligning Organizational Culture and Infrastructure to Support Evidence-Based Practice                                                    | Project to promote EBP adoption          | NA                                    | Developing an integrated system to develop practices for implementing EBP in order to increase the results and gains of the people who receive nursing care.                                                                                            |
| Renolen et al. (2020) [32], Norway           | Research in Nursing & Health          | Creating room for evidence-based practice: Leader behavior in hospital wards                                                             | Grounded Theory                          | 63 staff nurses                       | To develop a theory about the behavioural patterns of leaders who are involved in the integration and implementation of EBP in clinical practice contexts.                                                                                              |
| Yiridomoh et al. (2020) [66], Ghana          | Rural Society                         | Evidence-based practice and rural health service delivery: knowledge and barriers to adoption among clinical nurses in Ghana             | Qualitative descriptive study            | 13 staff nurses                       | To understand, explain and demystify nurses' experience and knowledge of using EBP.                                                                                                                                                                     |
| Duff et al. (2020) [33], USA                 | Implementation Science Communications | Determinants of an evidence-based practice environment: an interpretive description                                                      | Interpretative description (qualitative) | 12 staff nurses                       | To gather nurses' perspectives and experiences of using the Iowa Model of EBP in order to help inform its introduction in other clinical practice settings.                                                                                             |

|                                             |                                                                   |                                                                                                                                                                   |                               |                                                       |                                                                                                                                                                                                                                         |
|---------------------------------------------|-------------------------------------------------------------------|-------------------------------------------------------------------------------------------------------------------------------------------------------------------|-------------------------------|-------------------------------------------------------|-----------------------------------------------------------------------------------------------------------------------------------------------------------------------------------------------------------------------------------------|
| Alshammari et al. (2021) [44], Saudi Arabia | Nurse Media Journal of Nursing                                    | Factors affecting the implementation and barriers to Evidence-Based Practice among nurse practitioners in Hail Region, Saudi Arabia                               | Cross-sectional study         | 34 nurse managers<br>194 staff nurses                 | To investigate the factors that affect the implementation of EBP and to determine the barriers to its implementation as perceived by nurses.                                                                                            |
| Dagne et al (2021) [30], Ethiopia           | PLoS ONE                                                          | Implementation of evidence-based practice: The experience of nurses and midwives                                                                                  | Qualitative descriptive study | 86 staff nurses                                       | To explore the implementation of evidence-based practice by nurses and obstetric nurses practising in public hospitals.                                                                                                                 |
| Dagne et al. (2021) [67], Ethiopia          | Reproductive Health                                               | Implementation of evidence-based practice and associated factors among nurses and midwives working in Amhara Region government hospitals: a cross-sectional study | Cross-sectional study         | 77 nurse managers<br>254 midwife nurses<br>459 nurses | To evaluate the implementation of EBP and the factors associated with it among nurses and obstetric nurses.                                                                                                                             |
| Alqahtani et al. (2022) [45], Saudi Arabia  | Nursing Reports                                                   | Barriers to implementing Evidence-Based Practice among primary healthcare nurses in Saudi Arabia: A cross-sectional study                                         | Cross-sectional study         | 93 nurse managers<br>191 nurses                       | To study the barriers perceived by primary health care nurses in relation to the implementation of EBP.                                                                                                                                 |
| Alqahtani et al. (2022) [34], Saudi Arabia  | International Journal of Environmental Research and Public Health | Organizational factors associated with Evidence-Based Practice knowledge, attitudes, and implementation among nurses in Saudi Arabia                              | Cross-sectional study         | 227 staff nurses                                      | To examine the organisational factors that influence nurses' knowledge, attitudes and implementation of EBP and to identify their perceptions of nursing leadership in EBP and hospital support for its implementation in Saudi Arabia. |
| Crawford et al. (2022) [29], USA            | Worldviews on Evidence-Based Nursing                              | Barriers and facilitators influencing EBP readiness: Building organizational and nurse capacity                                                                   | Cross-sectional study         | 724 staff nurses                                      | Describe EBP preparedness, barriers, and facilitators reported by nurses in a nationwide healthcare system before COVID-19.                                                                                                             |
| Lanssens et al. (2022) [65], Belgium        | European Journal of Midwifery                                     | Knowledge, attitudes and use of evidence-based practice among midwives in Belgium: A cross-sectional survey                                                       | Cross-sectional study         | 251 midwife nurses                                    | To explore the practice, attitudes and barriers associated with the implementation of EBP in the context of professional midwifery practice in hospitals and primary health care by nurse midwives in Flanders - Belgium.               |
| Li et al. (2022) [58], China                | International Journal of Nursing Sciences                         | Knowledge, attitude and behaviour to evidence-based practice among psychiatric nurses: A cross-sectional survey                                                   | Cross-sectional study         | 923 mental health and psychiatric nurses              | To determine the level of knowledge, attitudes and behaviour towards evidence-based practice (EBP) among Chinese psychiatric nurses, and to study the factors that influence the implementation of EBP.                                 |

NA: not applicable.
